# Supplementary material for: Detection and Analysis of Syntenic Quantitative Trait Loci Controlling Cell Wall Quality in Angiosperms
Source: PubMed Central journal article supplement (PMC8928447; doi:10.3389/fpls.2022.855093), 2022-03-03

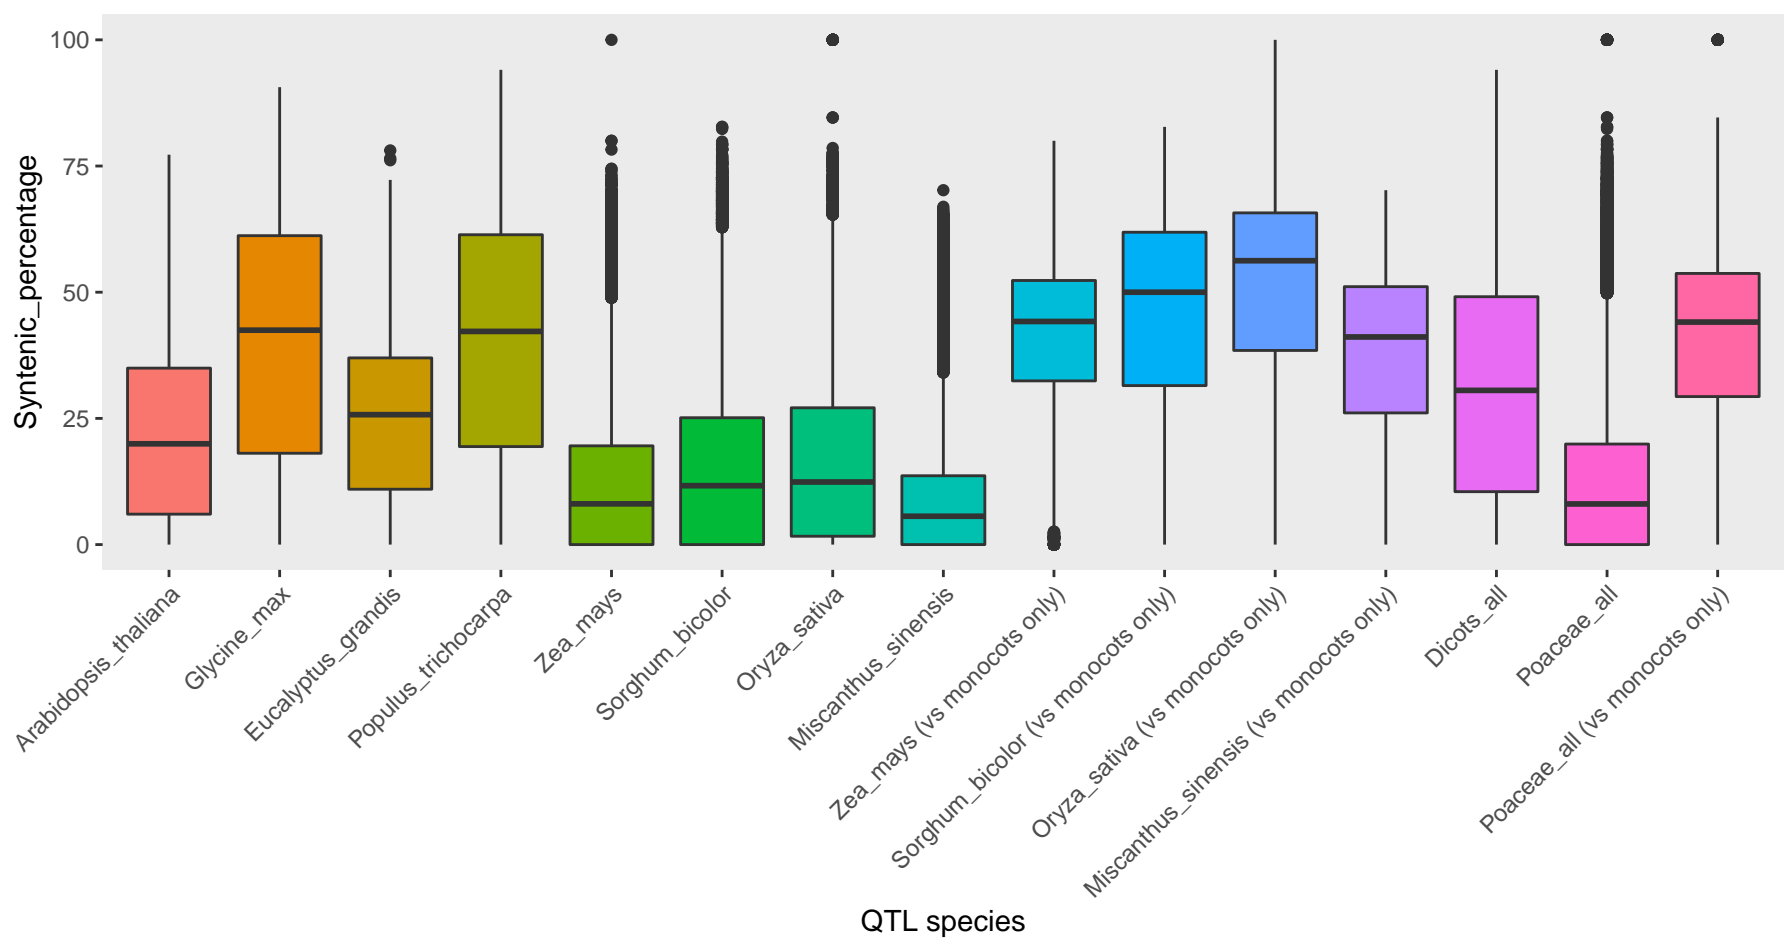

Supplement: Image_1.pdf [file Image_1.pdf]
