# Supplementary material for: Detection and Analysis of Syntenic Quantitative Trait Loci Controlling Cell Wall Quality in Angiosperms
Source: Front Plant Sci. 2022 Mar 3;13:855093. doi: 10.3389/fpls.2022.855093 (PMC8928447; doi:10.3389/fpls.2022.855093)
Supplement: Supplementary file 7 [file Table_6.xlsx]

## Sheet: Sheet1
Supplementary Table 6 - The 50 QTLs spanning only one candidate cell wall gene
CW_QTL_ID	Species	Chromosome	Start (bp)	End (bp)	Cell wall gene ID	Broad CW gene process	CW gene function (see Supplementary Table 3 for acronyms)
QTL_067	Eucalyptus grandis	NG_Chr_09	2126459	2134615	NG_Eucgr.I00108	CW_Other_proteins	BGAL
QTL_104	Glycine max	ES_Chr_13	33409260	33416117	ES_XP_003541673.1	Hemicellulose_metabolism	GALT
QTL_114	Miscanthus sinensis	GQ_Chr_03	4317568	4320742	GQ_03G017900	Hemicellulose_metabolism	ARAE/MUR4/UXE
QTL_156	Miscanthus sinensis	GQ_Chr_09	41994680	41997913	GQ_09G113400	Hemicellulose_metabolism	BXL
QTL_157	Miscanthus sinensis	GQ_Chr_09	41994680	41997913	GQ_09G113400	Hemicellulose_metabolism	BXL
QTL_158	Miscanthus sinensis	GQ_Chr_09	41994680	41997913	GQ_09G113400	Hemicellulose_metabolism	BXL
QTL_164	Miscanthus sinensis	GQ_Chr_12	9488422	9489710	GQ_12G022800	Hemicellulose_metabolism	BAHD
QTL_165	Miscanthus sinensis	GQ_Chr_12	14625630	14637172	GQ_12G034600	CW_Other_proteins	XYN/XYN_like
QTL_169	Miscanthus sinensis	GQ_Chr_12	26250909	26259186	GQ_12G045400	Cellulose_synthesis	FRA1
QTL_170	Miscanthus sinensis	GQ_Chr_12	26250909	26259186	GQ_12G045400	Cellulose_synthesis	FRA1
QTL_171	Miscanthus sinensis	GQ_Chr_12	26250909	26259186	GQ_12G045400	Cellulose_synthesis	FRA1
QTL_172	Miscanthus sinensis	GQ_Chr_12	26250909	26259186	GQ_12G045400	Cellulose_synthesis	FRA1
QTL_173	Miscanthus sinensis	GQ_Chr_12	26250909	26259186	GQ_12G045400	Cellulose_synthesis	FRA1
QTL_201	Miscanthus sinensis	GQ_Chr_15	21322431	21330969	GQ_15G080900	Hemicellulose_metabolism/Pectin_metabolism	OFUT/RRT
QTL_202	Miscanthus sinensis	GQ_Chr_15	21322431	21330969	GQ_15G080900	Hemicellulose_metabolism/Pectin_metabolism	OFUT/RRT
QTL_208	Oryza sativa	HN_Chr_08	23623121	23628613	HN_XP_015648265.1	Cellulose_synthesis_UDP_Glu_supply	G6PI
QTL_211	Oryza sativa	HN_Chr_07	26340137	26344354	HN_XP_015644672.1	Pectin_metabolism	PAE
QTL_212	Oryza sativa	HN_Chr_08	2382080	2385366	HN_XP_015650198.1	Lignin_synthesis	4CL
QTL_214	Oryza sativa	HN_Chr_07	26340137	26344354	HN_XP_015644672.1	Pectin_metabolism	PAE
QTL_216	Oryza sativa	HN_Chr_08	2382080	2385366	HN_XP_015650198.1	Lignin_synthesis	4CL
QTL_219	Oryza sativa	HN_Chr_08	2382080	2385366	HN_XP_015650198.1	Lignin_synthesis	4CL
QTL_249	Populus trichocarpa	IU_Chr_14	2994771	2996977	IU_XP_024440759.1	CW_Other_proteins	EXT_LRX
QTL_250	Populus trichocarpa	IU_Chr_14	6994796	6998748	IU_XP_024441412.1	CW_Other_proteins	EXT_PERK
QTL_255	Populus trichocarpa	IU_Chr_14	6994796	6998748	IU_XP_024441412.1	CW_Other_proteins	EXT_PERK
QTL_292	Sorghum bicolor	LH_Chr_01	20237624	20244327	LH_XP_002467070.1	Hemicellulose_metabolism	UXT
QTL_305	Sorghum bicolor	LH_Chr_04	51311382	51316823	LH_XP_002452195.1	Cellulose_synthesis_UDP_Glu_supply	CINV
QTL_317	Sorghum bicolor	LH_Chr_05	53797331	53800781	LH_XP_021316679.1	Lignin_synthesis	FMT
QTL_320	Sorghum bicolor	LH_Chr_05	53797331	53800781	LH_XP_021316679.1	Lignin_synthesis	FMT
QTL_321	Sorghum bicolor	LH_Chr_05	52195737	52197639	LH_XP_021316826.1	Lignin_synthesis	BBE_like
QTL_339	Sorghum bicolor	LH_Chr_07	6021044	6029713	LH_XP_002445136.2	Lignin_synthesis	COMT
QTL_348	Sorghum bicolor	LH_Chr_08	6475063	6485576	LH_XP_021301965.1	CW_Other_proteins	EXT
QTL_355	Sorghum bicolor	LH_Chr_03	53586274	53588503	LH_XP_002455880.1	CW_Other_proteins/Pectin_metabolism	EXT_LRX/PGI
QTL_356	Sorghum bicolor	LH_Chr_03	53586274	53588503	LH_XP_002455880.1	CW_Other_proteins/Pectin_metabolism	EXT_LRX/PGI
QTL_366	Sorghum bicolor	LH_Chr_07	60163030	60164341	LH_XP_021321518.1	CW_Other_proteins	EXPA/EXPB/EXPLA/EXPLB
QTL_367	Sorghum bicolor	LH_Chr_07	60163030	60164341	LH_XP_021321518.1	CW_Other_proteins	EXPA/EXPB/EXPLA/EXPLB
QTL_430	Zea mays	ND_Chr_09	25084494	25087793	ND_XP_008659357.1	CW_Other_proteins	THE1
QTL_435	Zea mays	ND_Chr_09	19192368	19193956	ND_NP_001183762.1	Hemicellulose_metabolism	BAHD
QTL_437	Zea mays	ND_Chr_09	25084494	25087793	ND_XP_008659357.1	CW_Other_proteins	THE1
QTL_479	Zea mays	ND_Chr_01	278529524	278532825	ND_NP_001151770.2	Cellulose_synthesis/CW_Other_proteins	CEL/Endoglucanase/KOR
QTL_494	Zea mays	ND_Chr_02	38667852	38670861	ND_NP_001130915.1	Cellulose_synthesis	CEL
QTL_495	Zea mays	ND_Chr_02	38667852	38670861	ND_NP_001130915.1	Cellulose_synthesis	CEL
QTL_502	Zea mays	ND_Chr_03	2653990	2658410	ND_XP_008672660.1	Hemicellulose_metabolism	ESK1/MOAT/TBL29/TBL3/TBL31/TBL32/TBL33/XOAT1
QTL_503	Zea mays	ND_Chr_03	2653990	2658410	ND_XP_008672660.1	Hemicellulose_metabolism	ESK1/MOAT/TBL29/TBL3/TBL31/TBL32/TBL33/XOAT1
QTL_504	Zea mays	ND_Chr_03	2653990	2658410	ND_XP_008672660.1	Hemicellulose_metabolism	ESK1/MOAT/TBL29/TBL3/TBL31/TBL32/TBL33/XOAT1
QTL_518	Zea mays	ND_Chr_04	1259881	1261631	ND_XP_008677827.1	Hemicellulose_metabolism	ESK1/MOAT/TBL29/TBL3/TBL31/TBL32/TBL33/XOAT1
QTL_519	Zea mays	ND_Chr_04	1259881	1261631	ND_XP_008677827.1	Hemicellulose_metabolism	ESK1/MOAT/TBL29/TBL3/TBL31/TBL32/TBL33/XOAT1
QTL_520	Zea mays	ND_Chr_04	1259881	1261631	ND_XP_008677827.1	Hemicellulose_metabolism	ESK1/MOAT/TBL29/TBL3/TBL31/TBL32/TBL33/XOAT1
QTL_535	Zea mays	ND_Chr_05	5958673	5962313	ND_NP_001151808.1	Pectin_metabolism	MUCI70
QTL_539	Zea mays	ND_Chr_05	180644444	180646261	ND_NP_001344082.1	Lignin_synthesis	UGT72E2
QTL_595	Zea mays	ND_Chr_08	173025289	173029575	ND_NP_001317487.1	Hemicellulose_metabolism/Pectin_metabolism	MSR/OFUT/RRT
